# Supplementary material
Source: publisher figshare collection journal article supplement (https://tandf.figshare.com/ndownloader/files/22581182)

**Spectra of target compounds 8a-8j**

**Spectra of compound 8a**

*1H NMR spectrum*

Figure S16


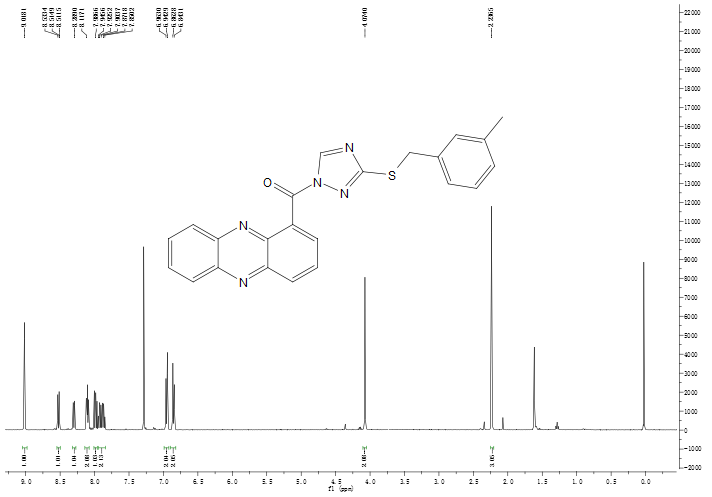


*13C NMR spectrum*

Figure S16


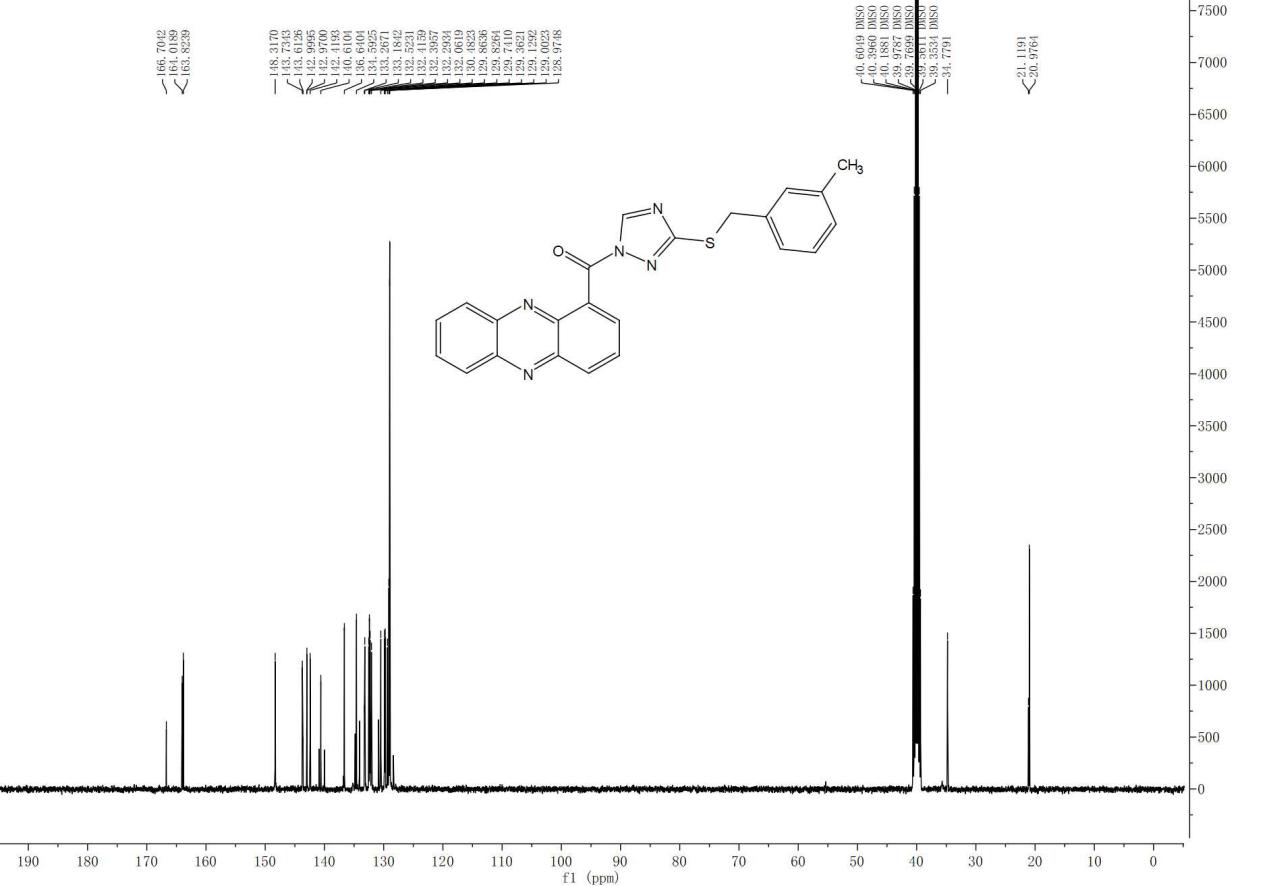


*HRMS Spectrum*

Figure S16


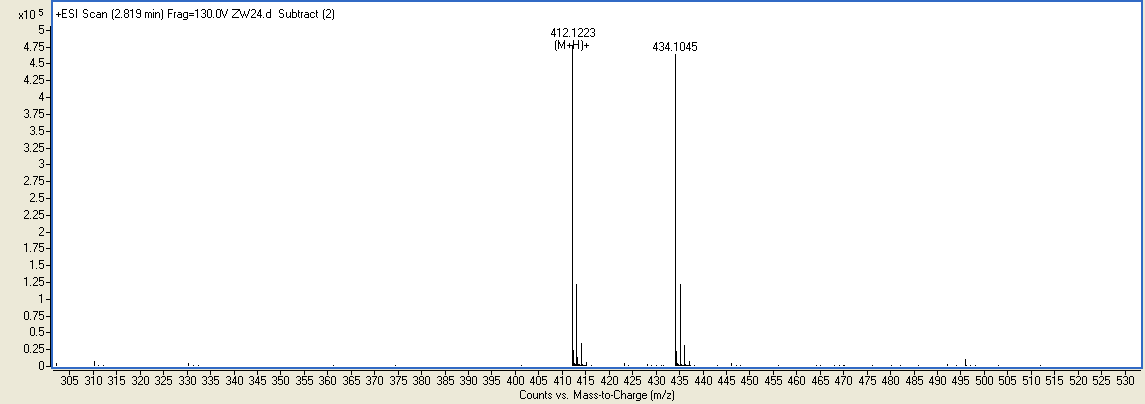


**Spectra of compound 8b**

*1H NMR spectrum*

Figure S17


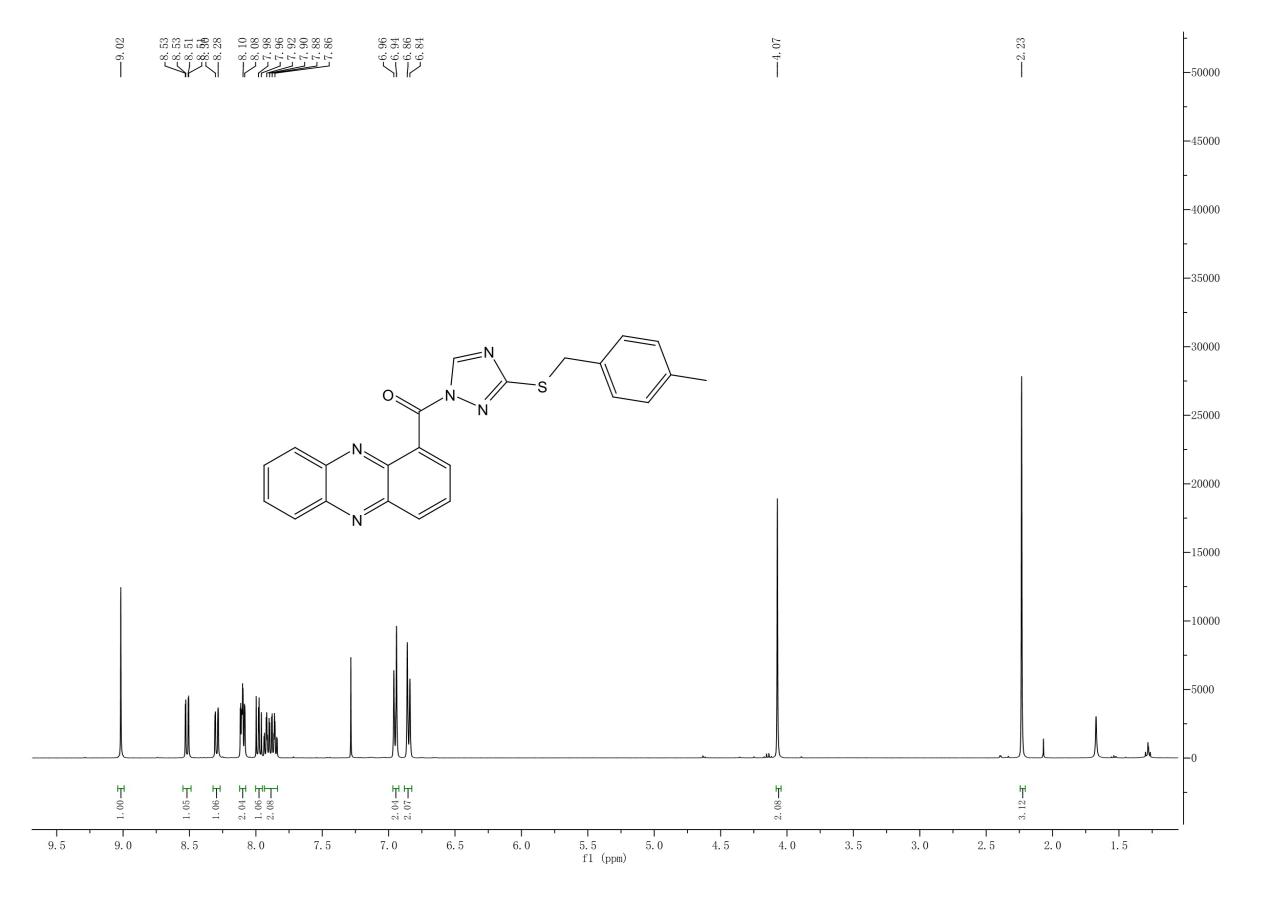


*13C NMR spectrum*

Figure S17


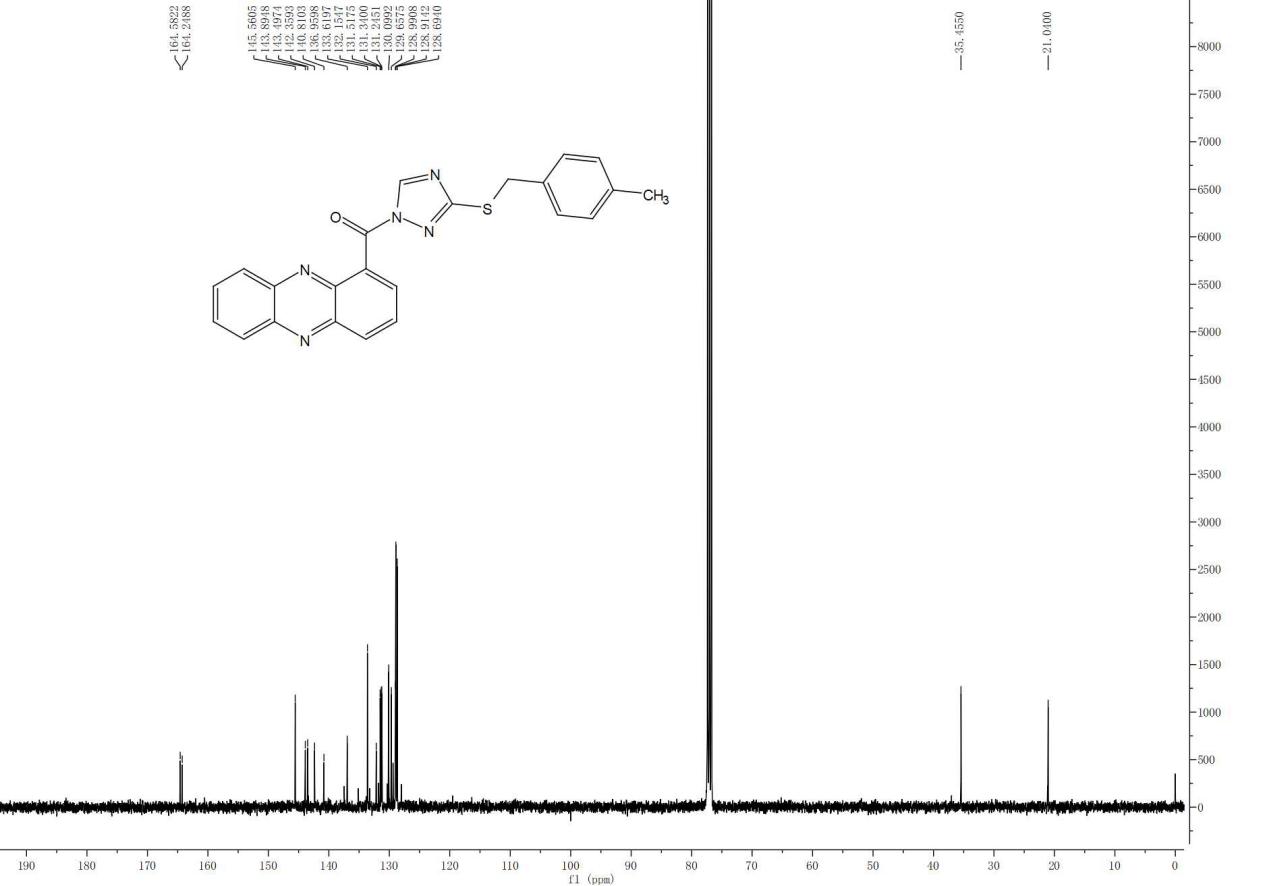


*HRMS Spectrum*

Figure S17

**Spectra of compound 8c**


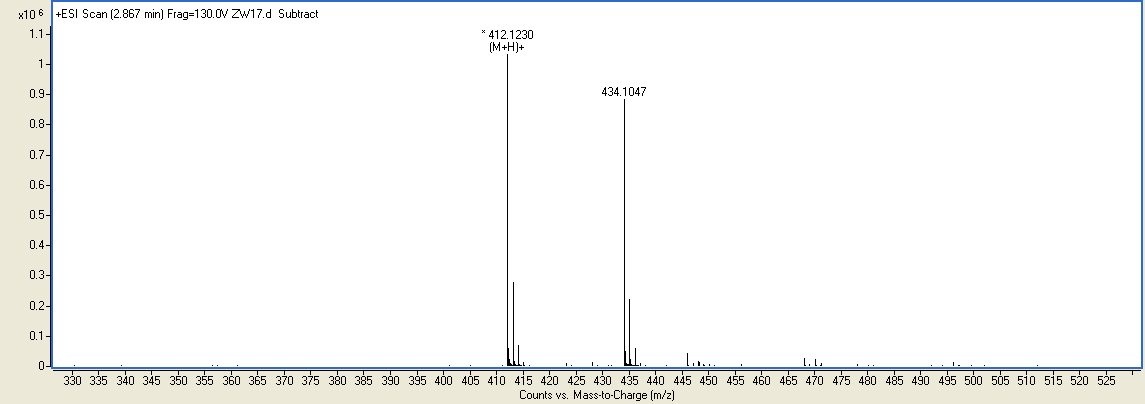


*1H NMR spectrum*

Figure S18


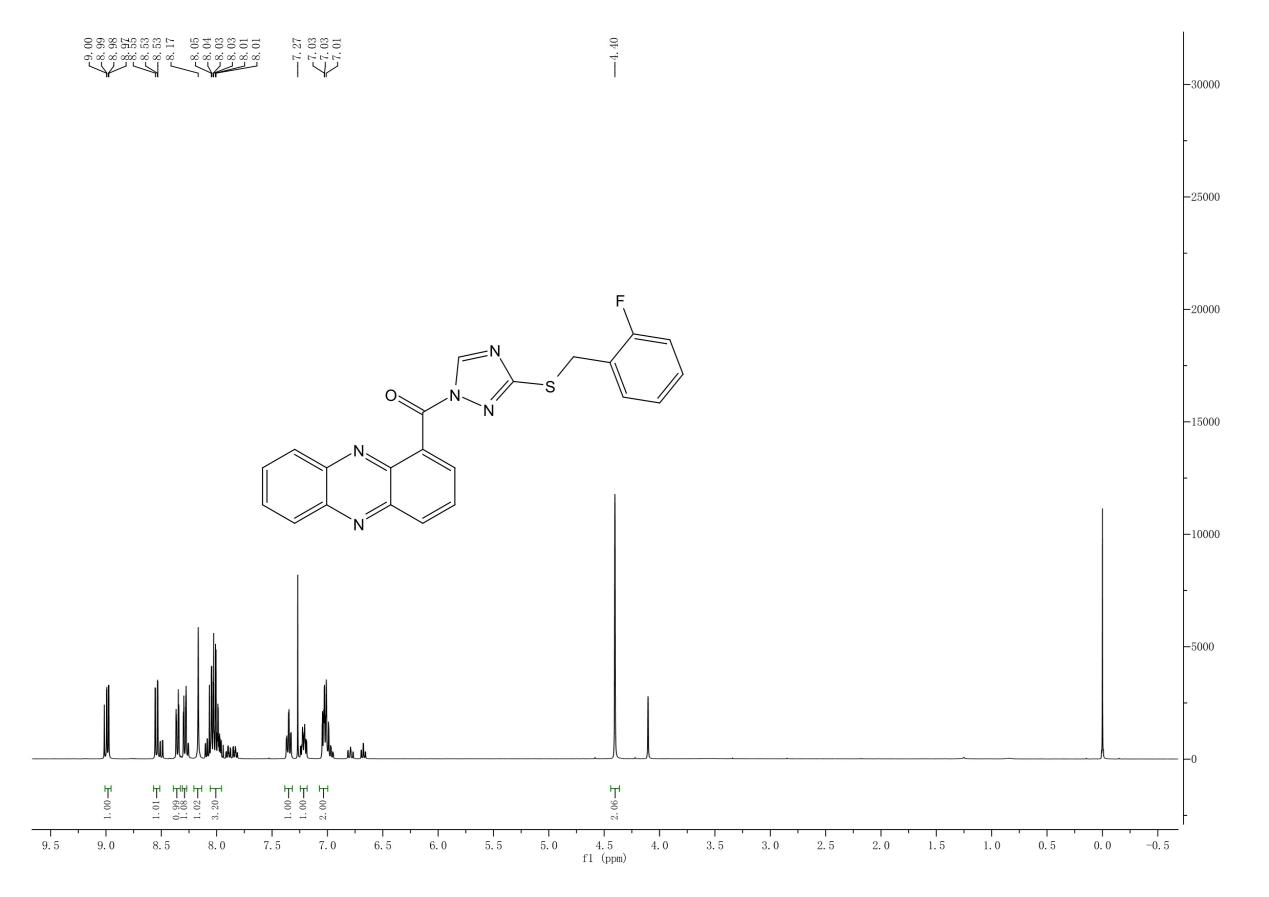


*13C NMR spectrum*

Figure S18


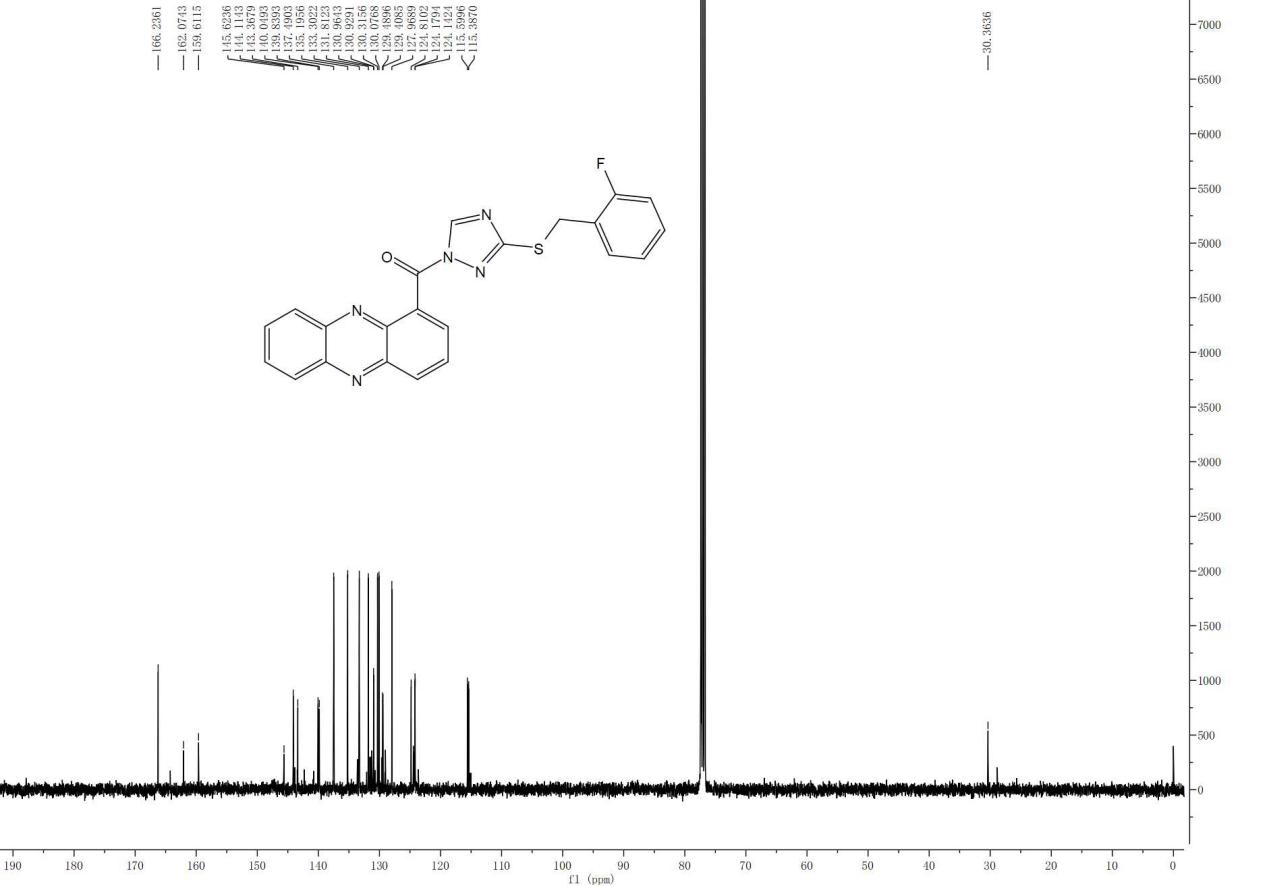


*HRMS Spectrum*

Figure S18


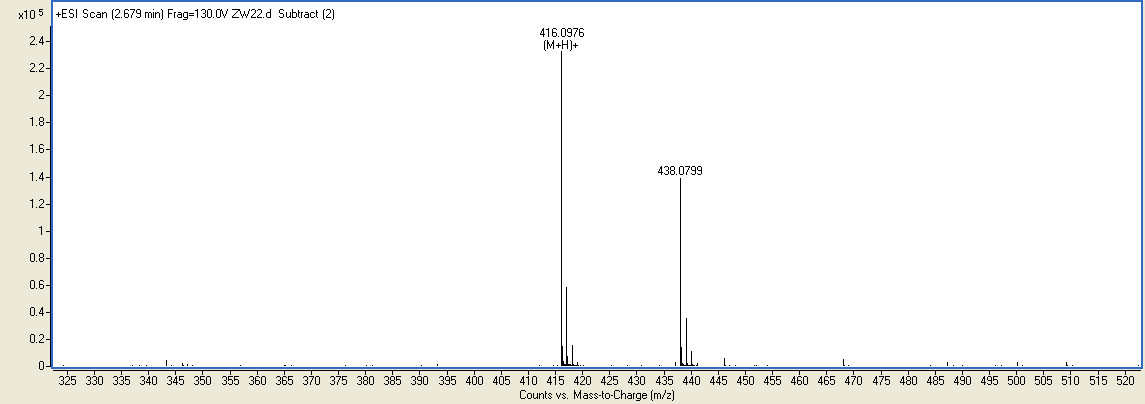


**Spectra of compound 8d**

*1H-NMR spectrum*

Figure S19


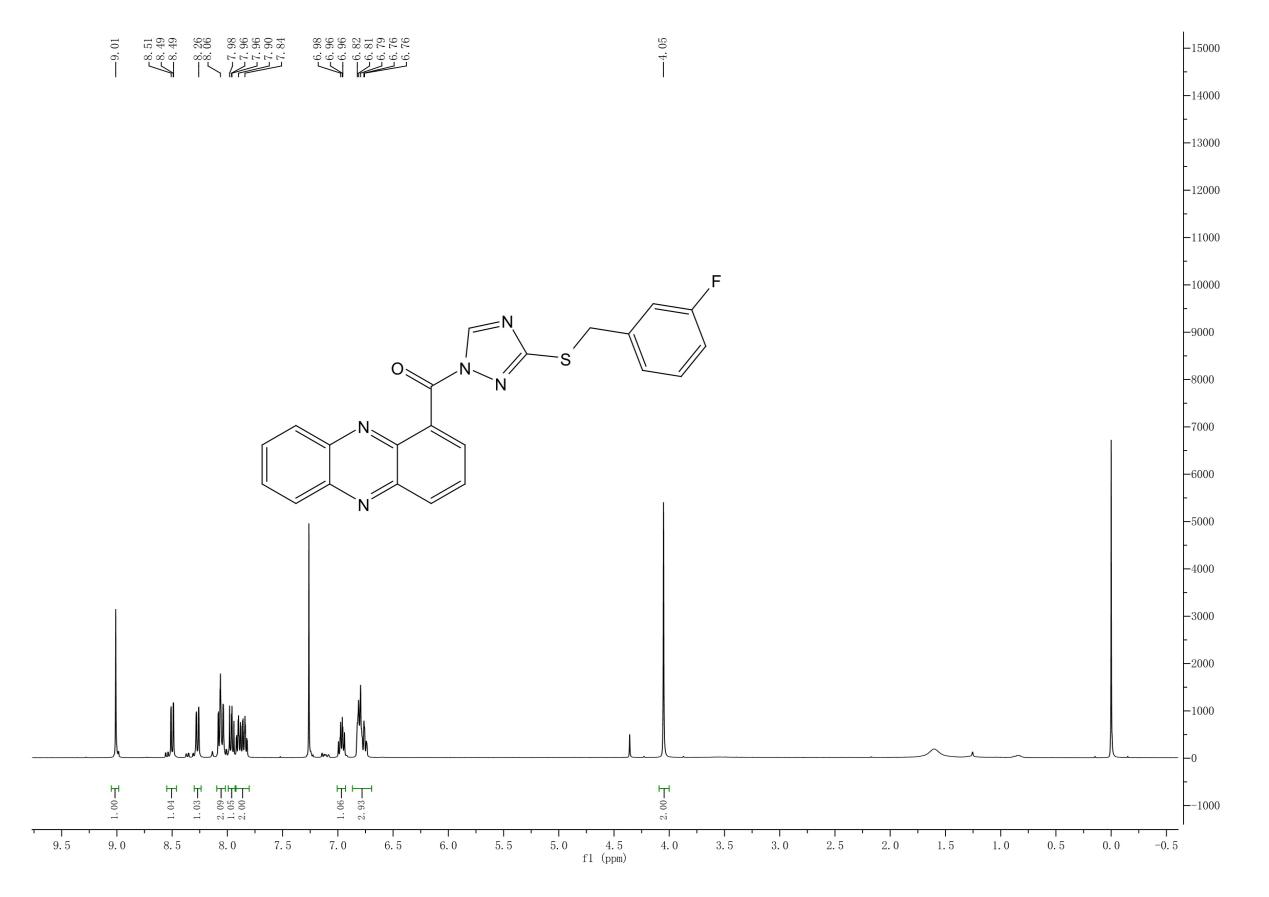


*13C NMR spectrum*

Figure S19


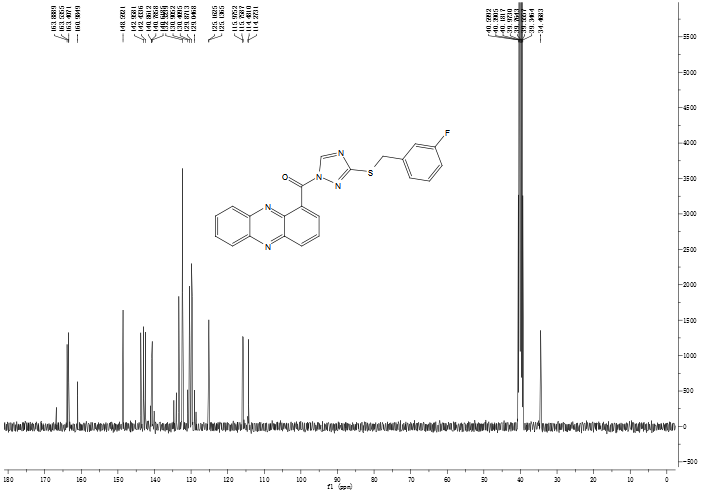


*HRMS Spectrum*

Figure S19


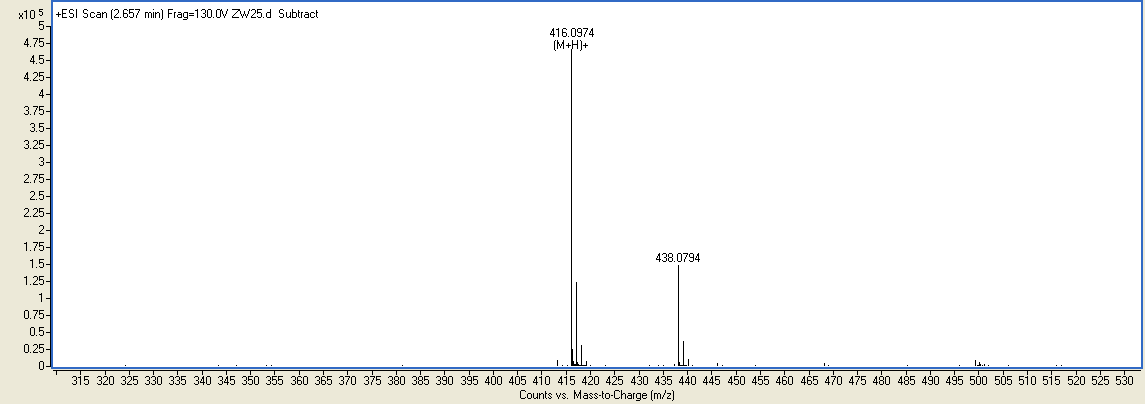


**Spectra of compound 8e**

*1H NMR spectrum*

Figure S20


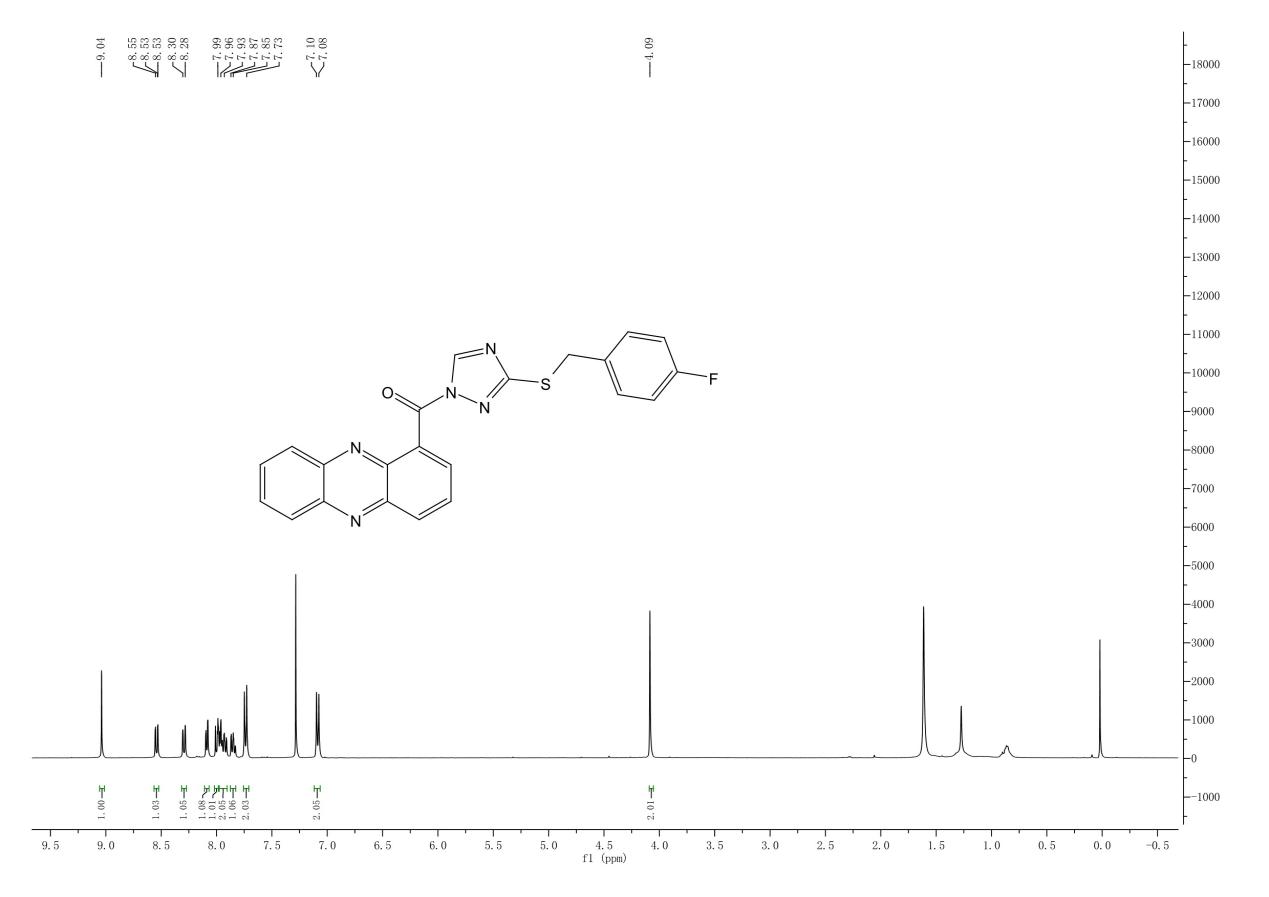


*13C NMR spectrum*

Figure S20


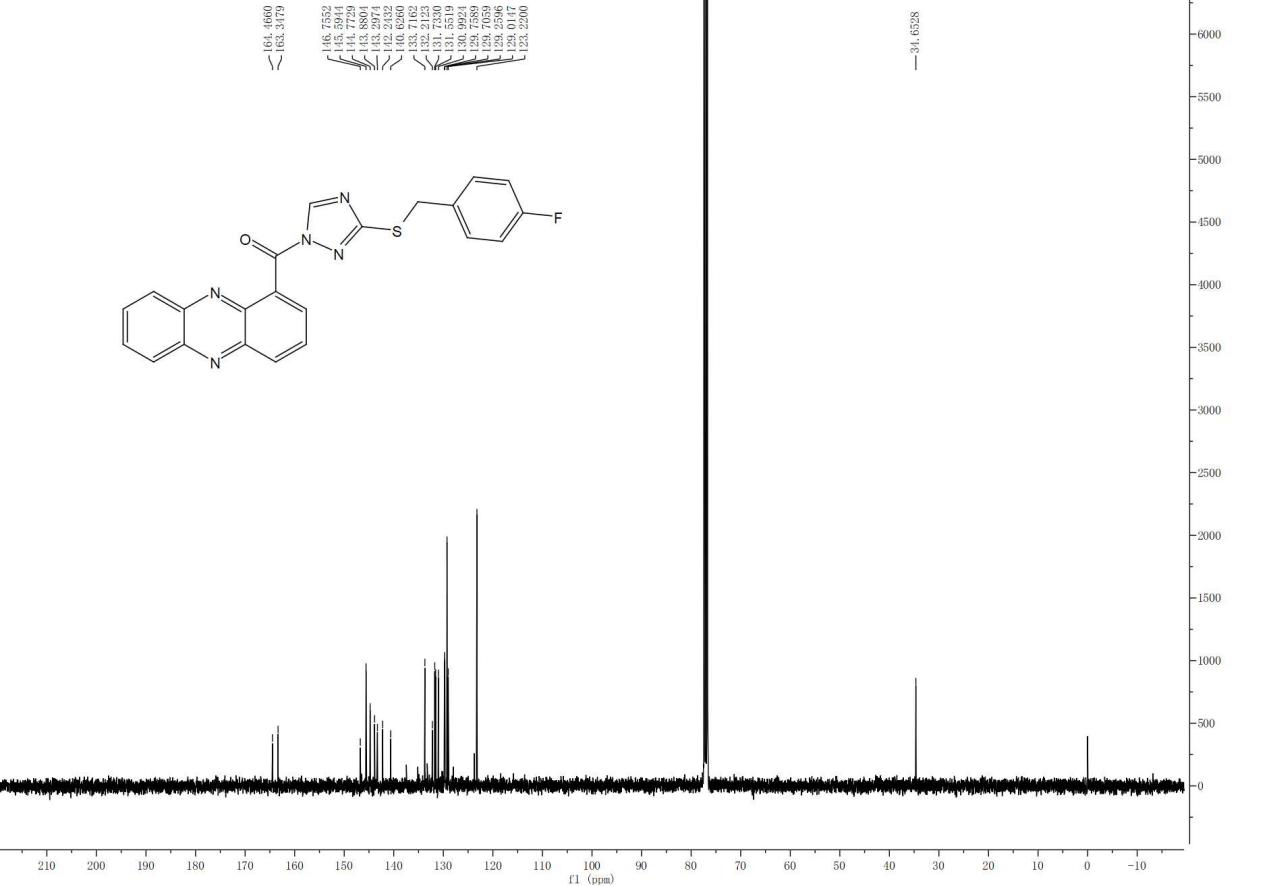


*HRMS Spectrum*

Figure S20


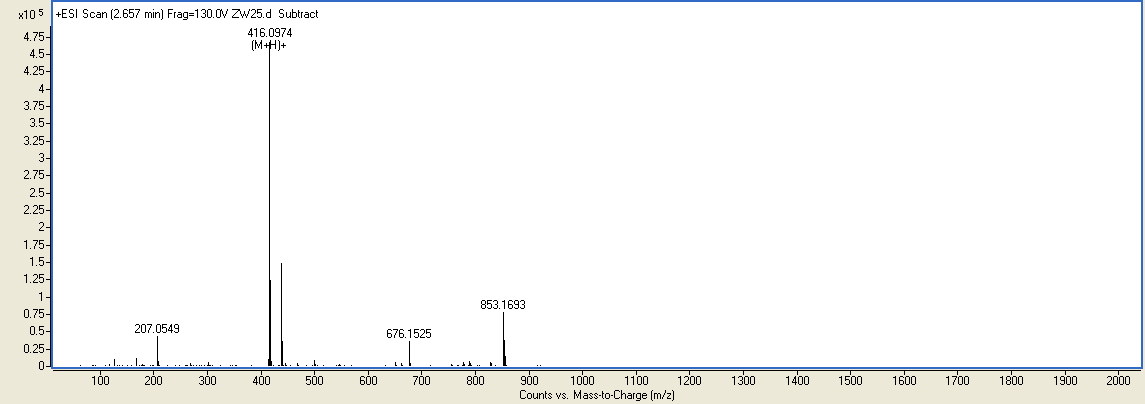
**Spectra of compound 8f**

*1H NMR spectrum*

Figure S21


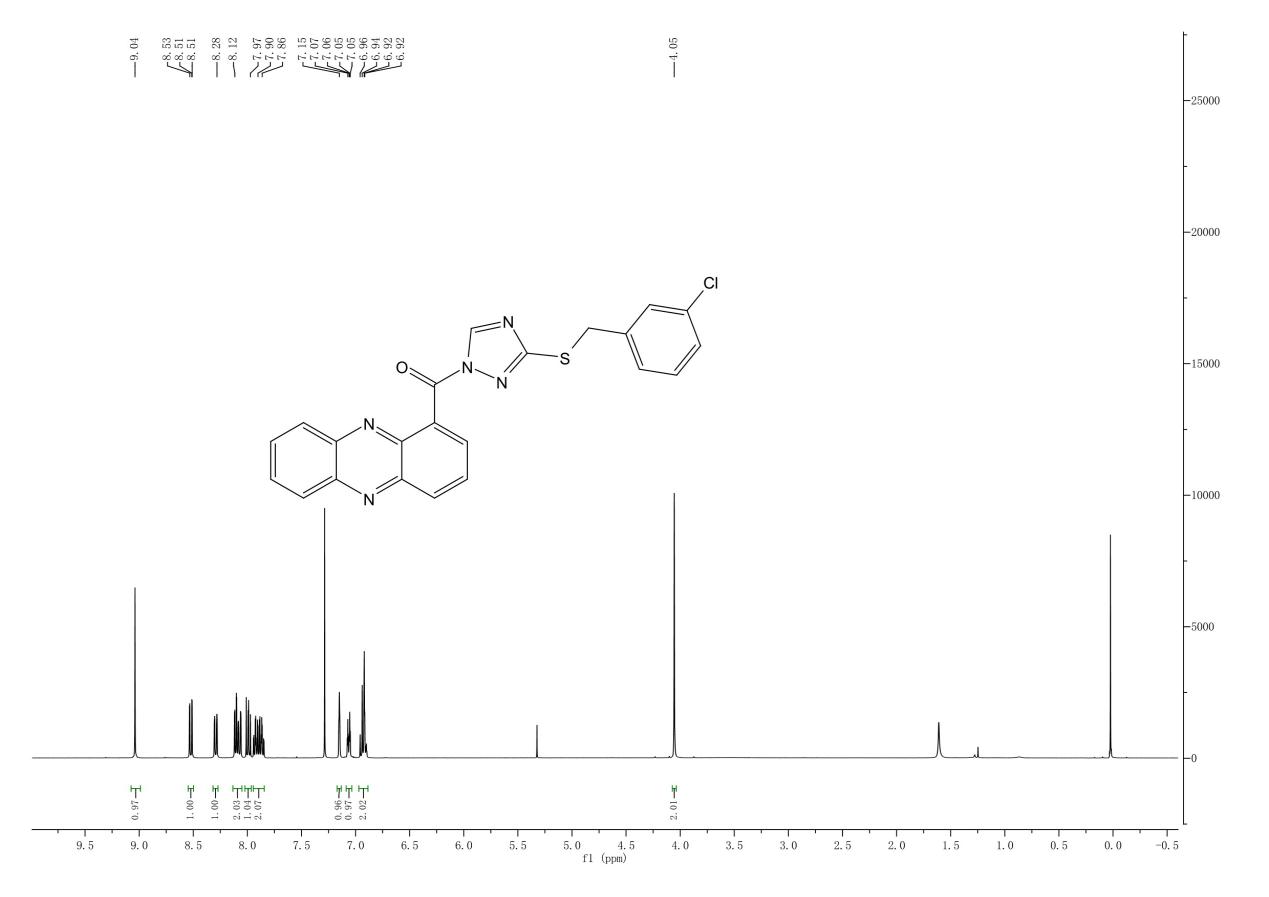


*13C NMR spectrum*

Figure S21


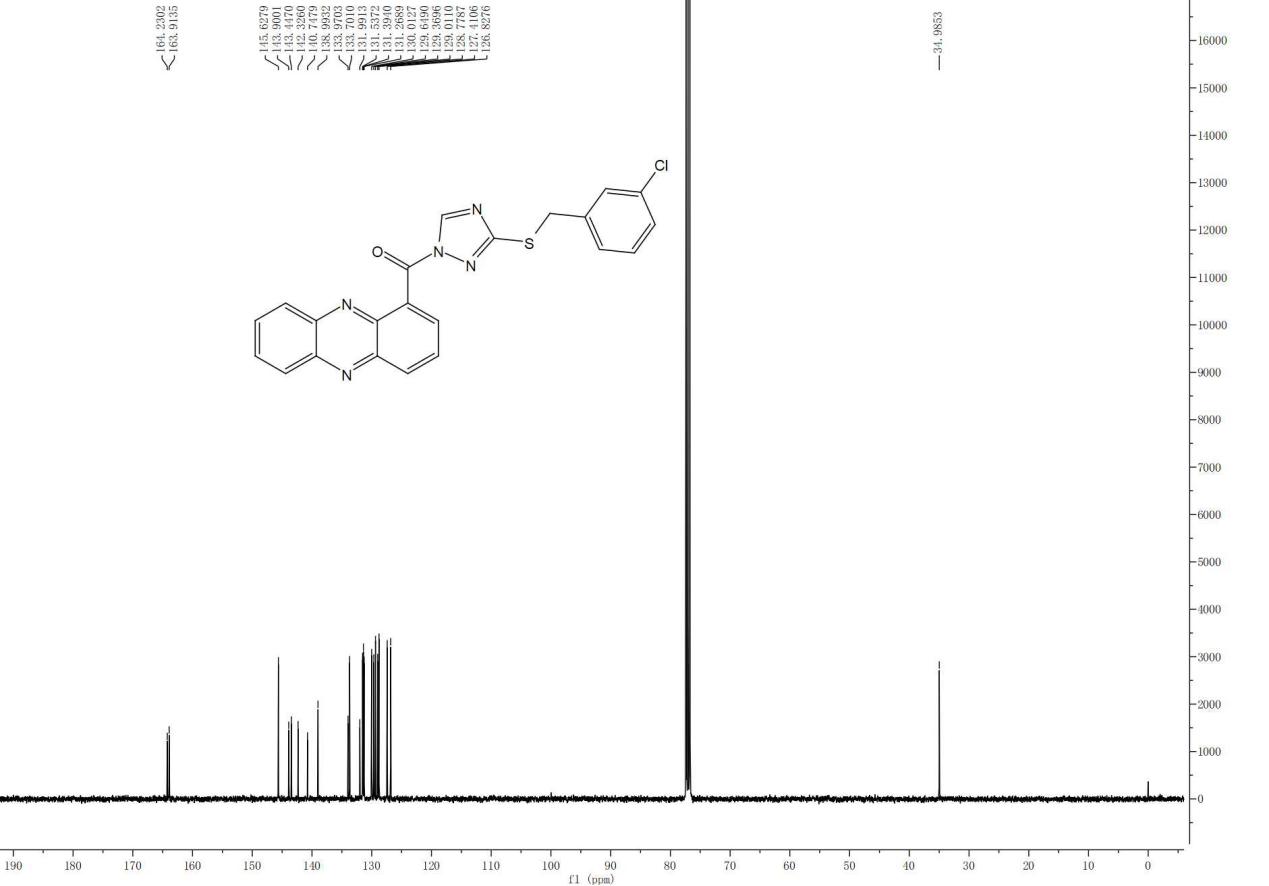


*HRMS Spectrum*

Figure S21


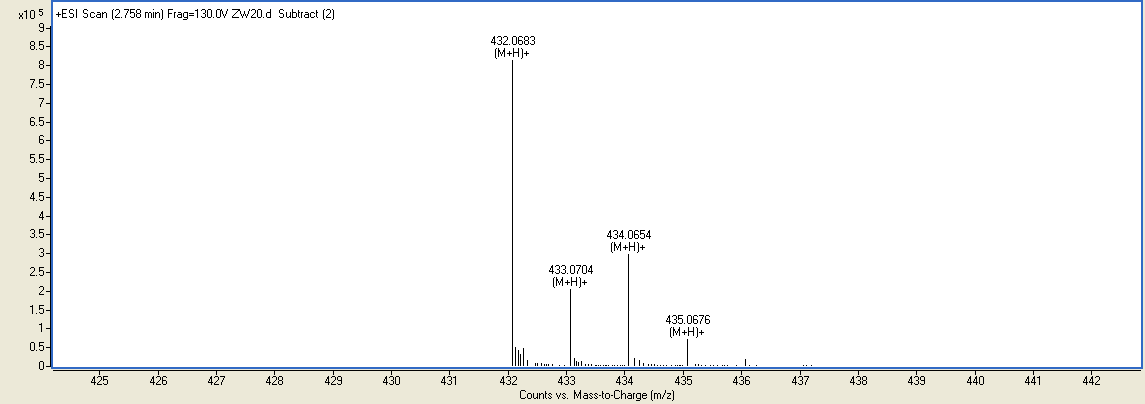


**Spectra of compound 8g**

*1H NMR spectrum*

Figure S22


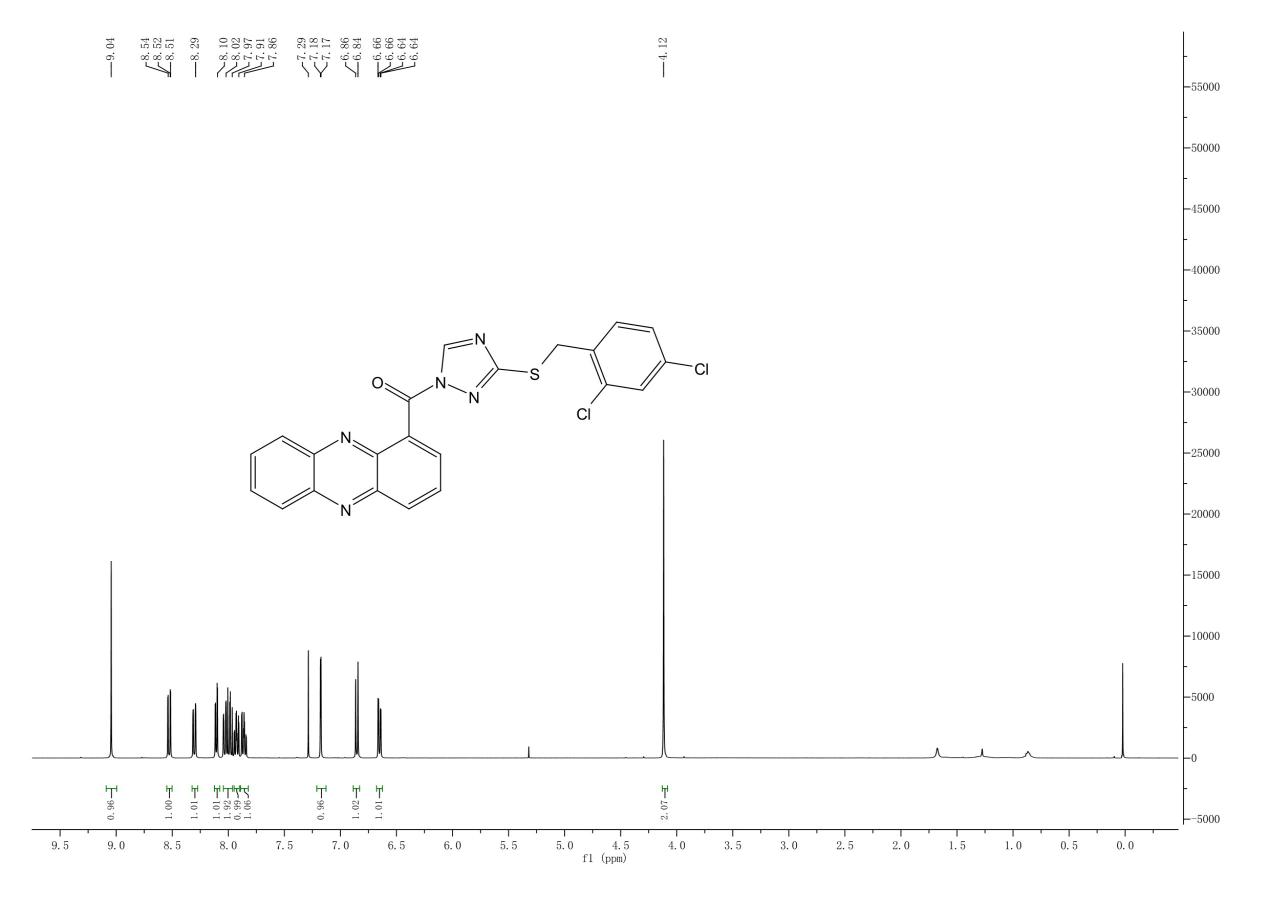


*13C NMR spectrum*

Figure S22


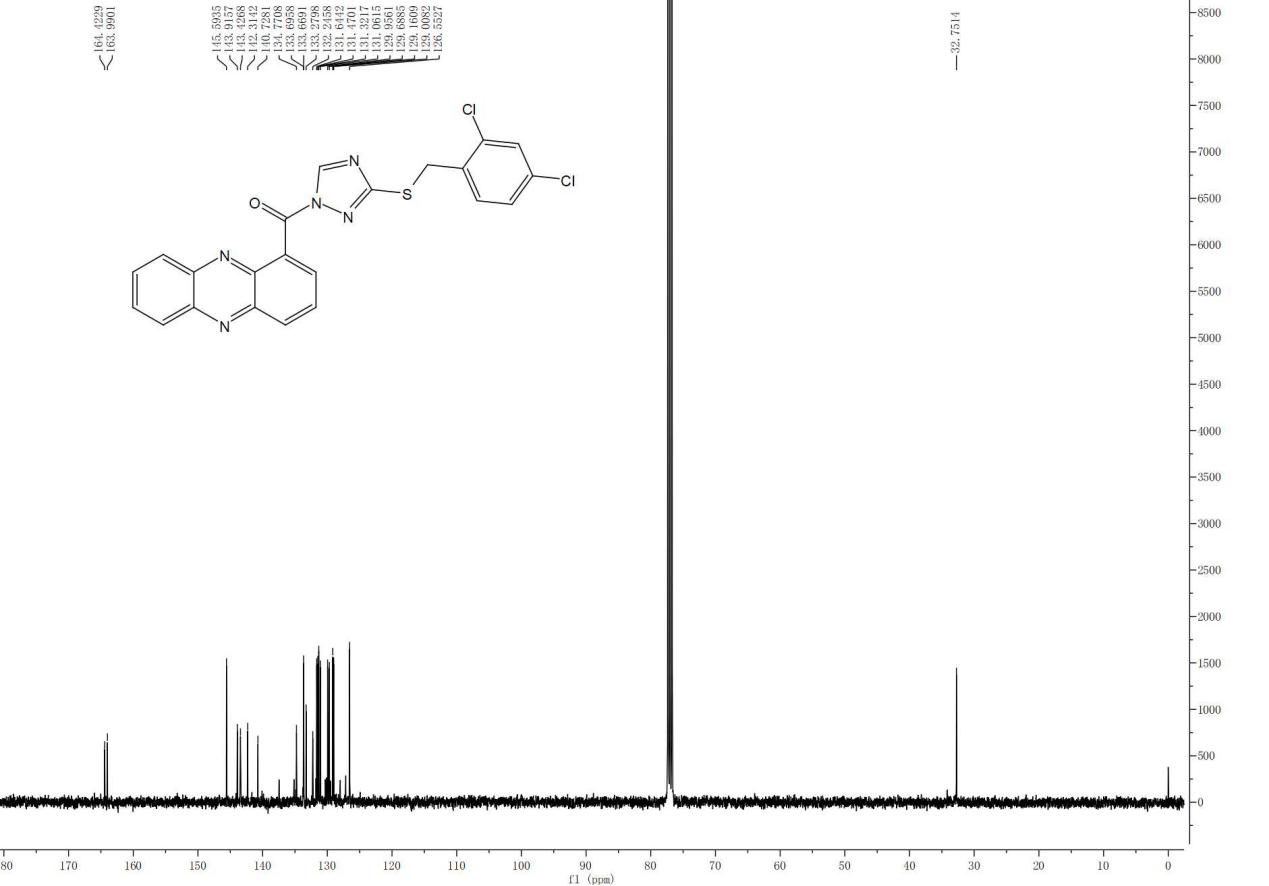


*HRMS Spectrum*

Figure S22


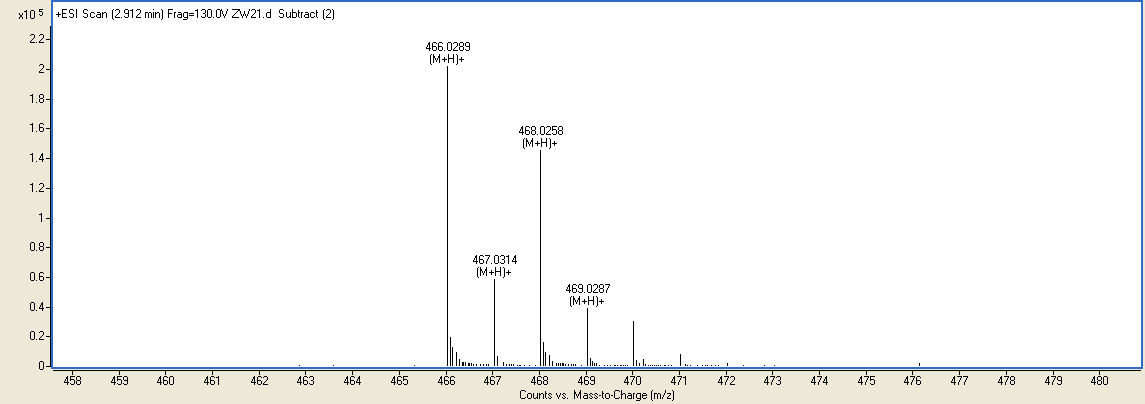


**Spectra of compound 8h**

*1H NMR spectrum*

Figure S23


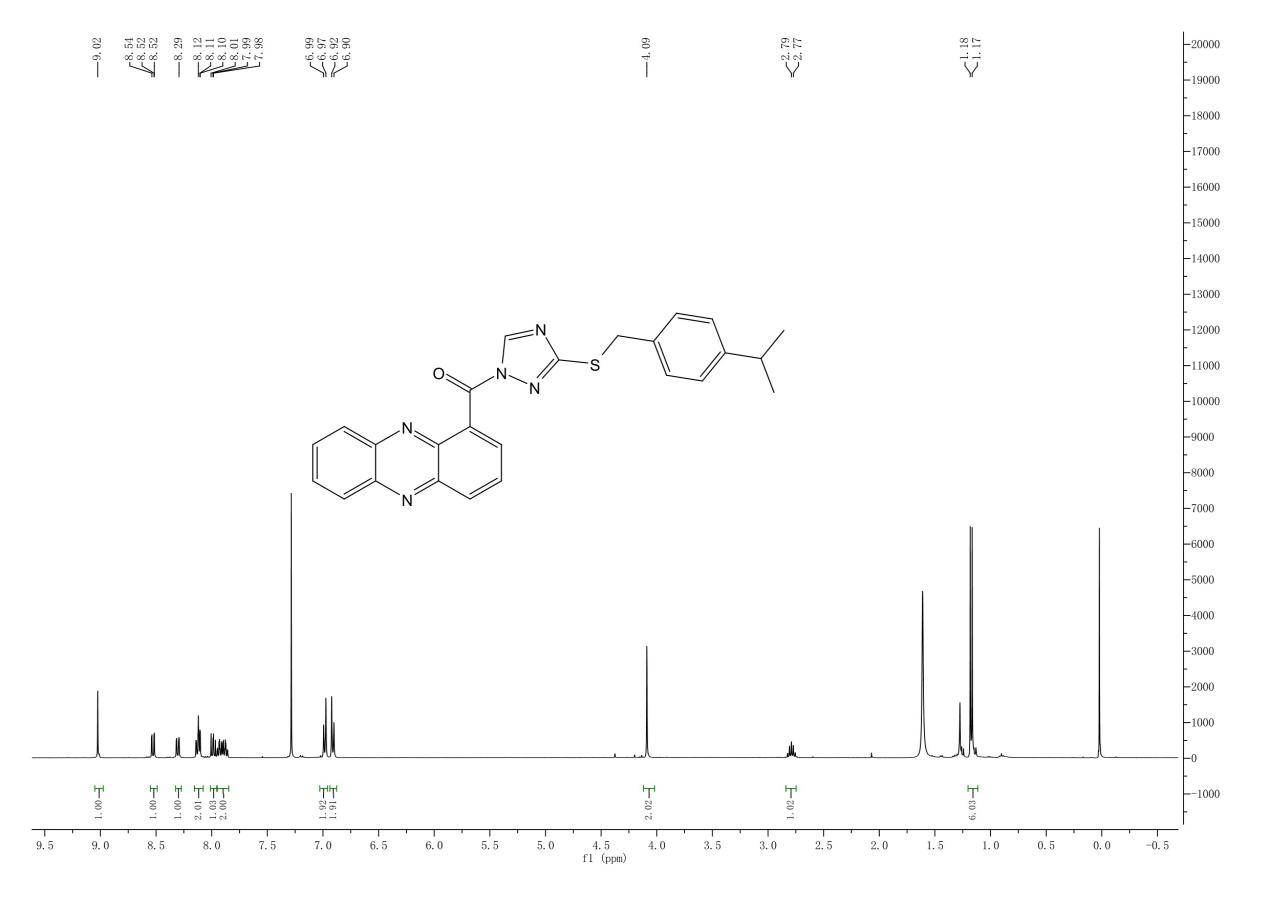


*13C NMR spectrum*

Figure S23


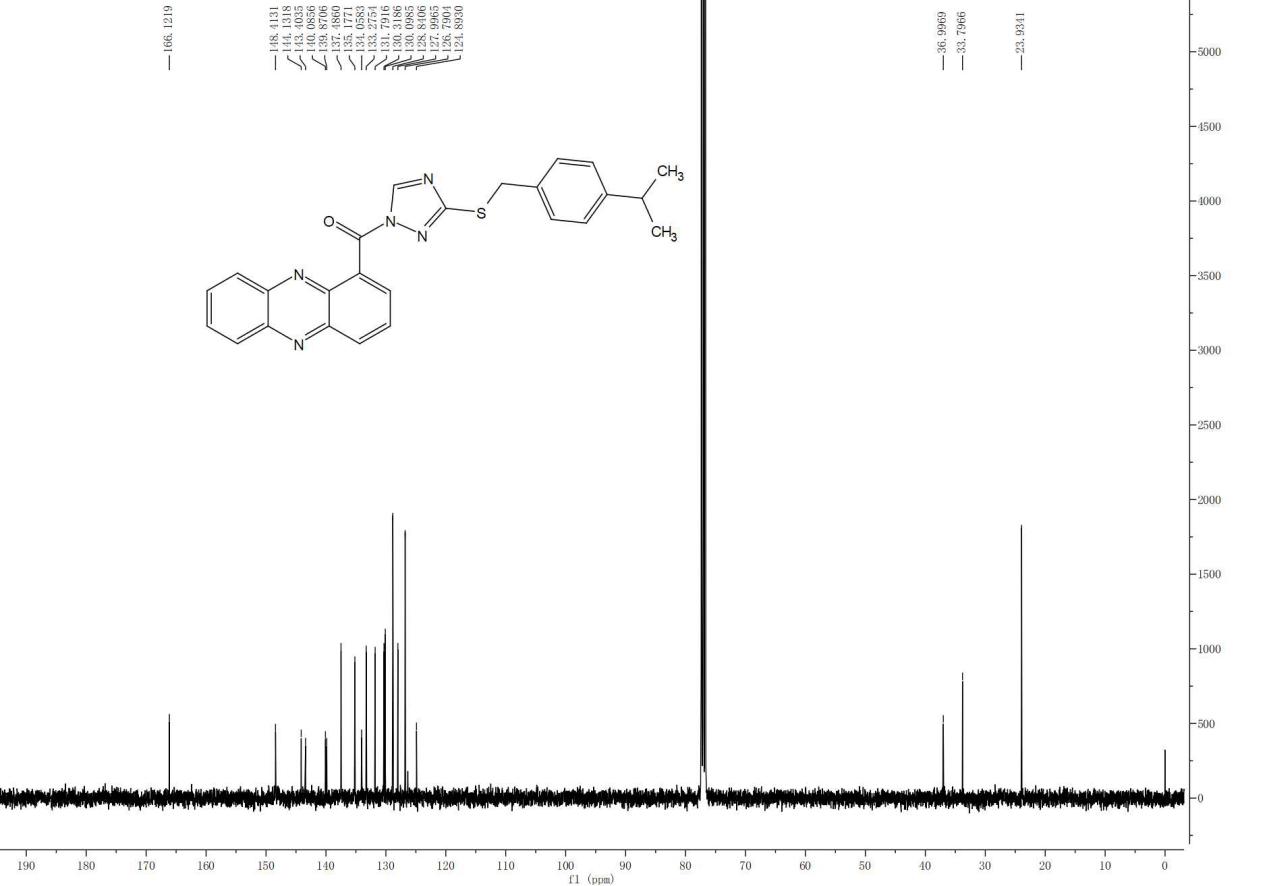


*HRMS Spectrum*

Figure S23


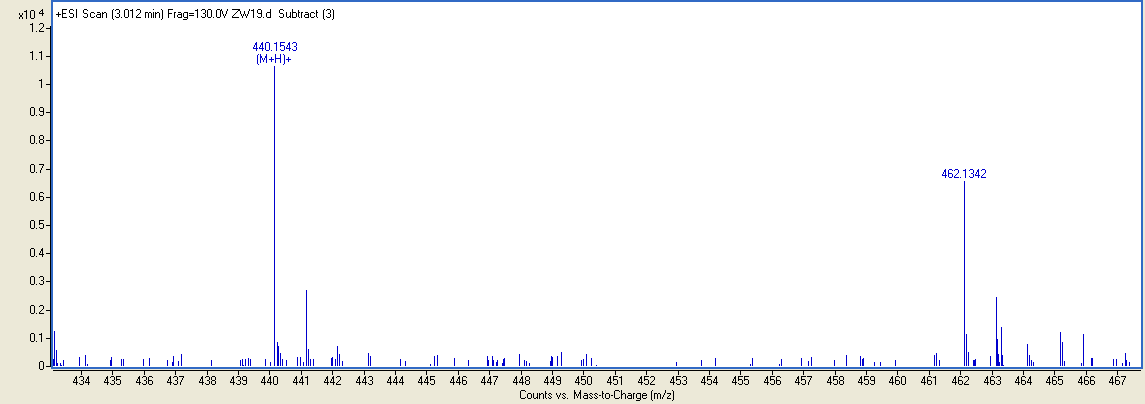


**Spectra of compound 8i**

*1H NMR spectrum*

Figure S24


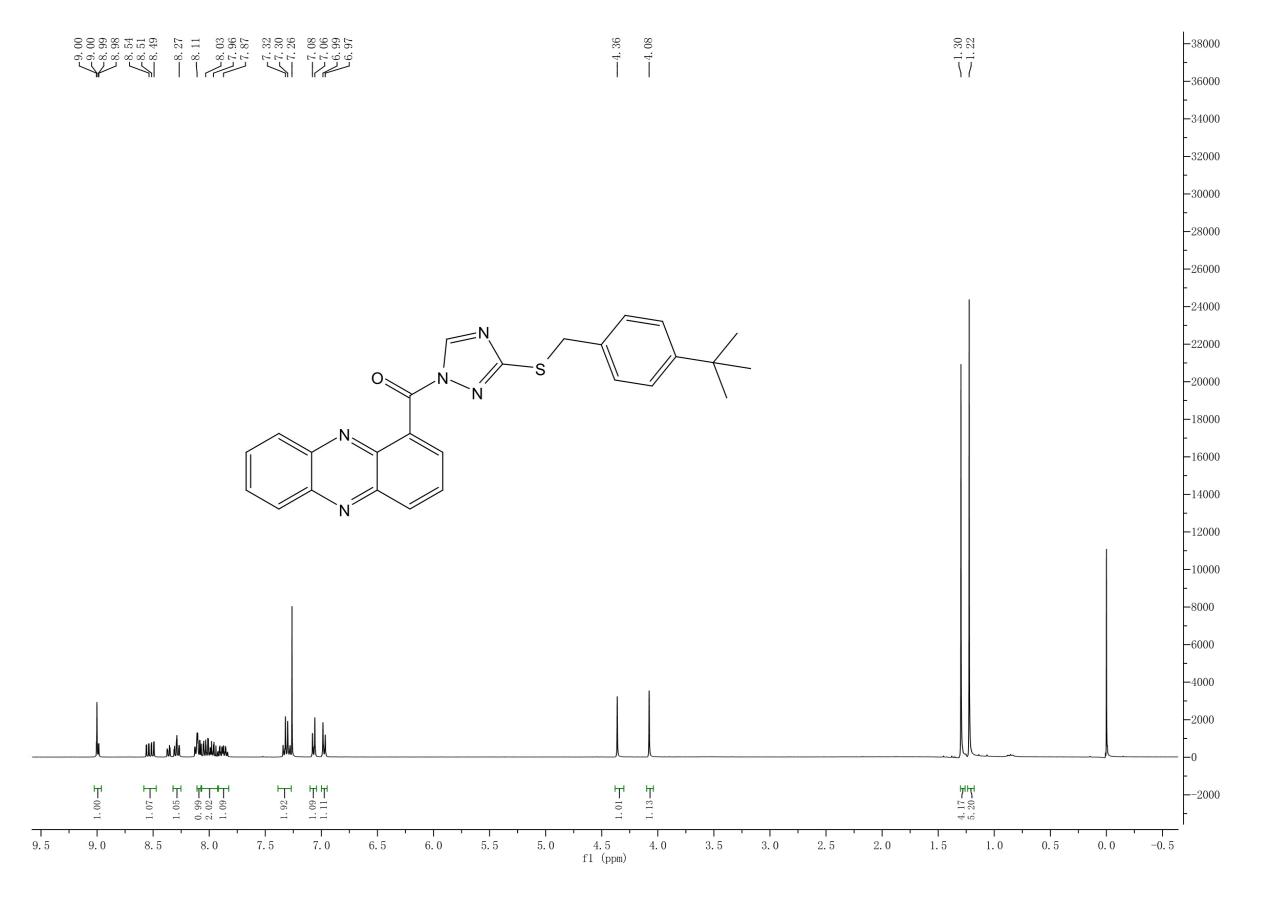


*13C NMR spectrum*

Figure S24


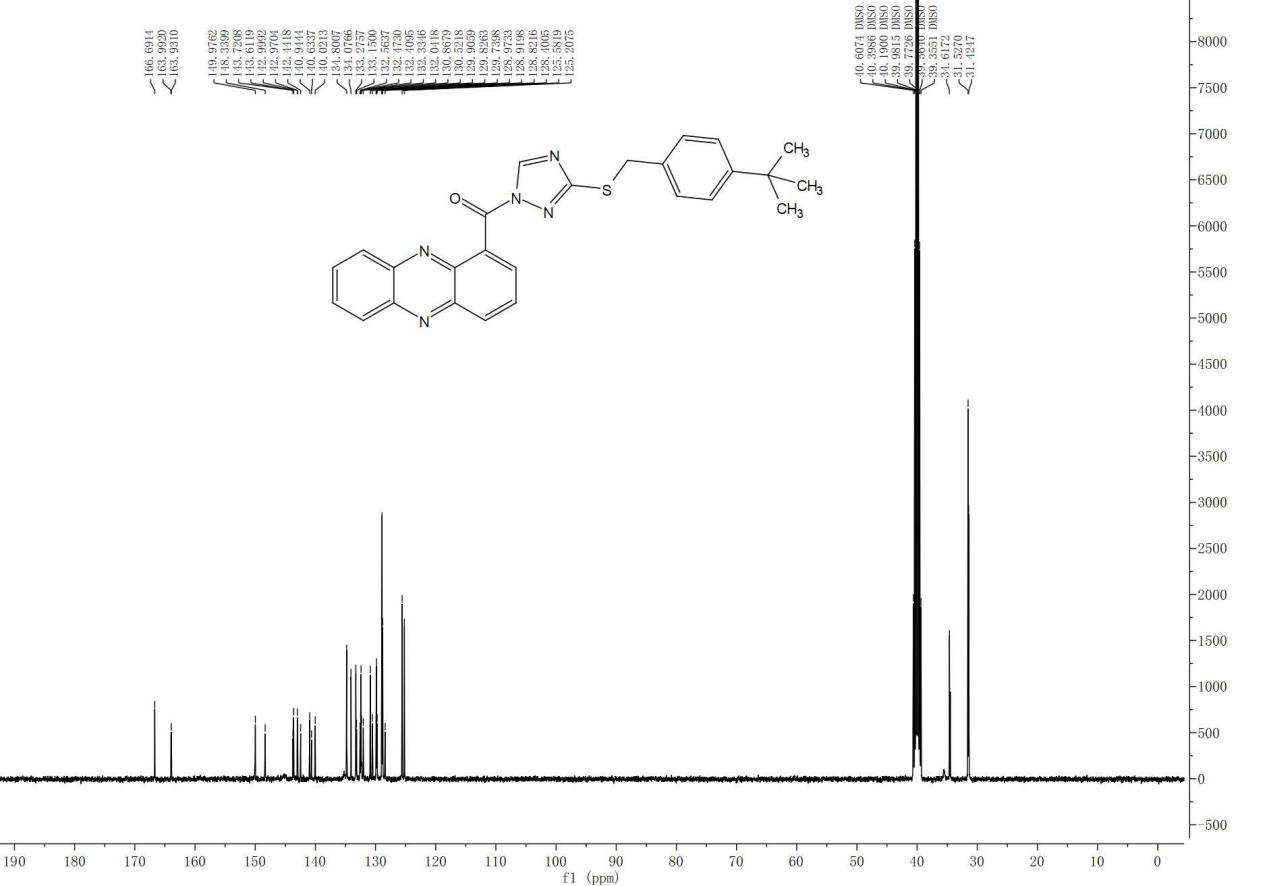


*HRMS Spectrum*

Figure S24


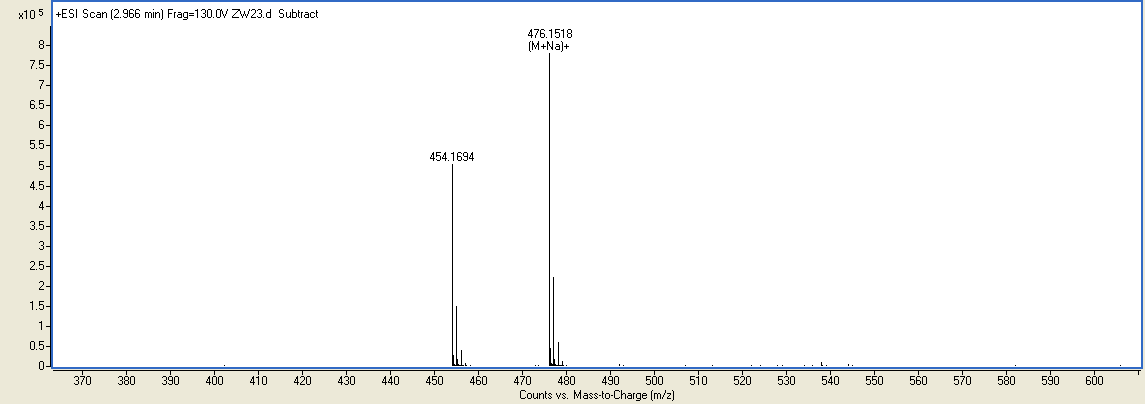


**Spectra of compound 8j**

*1H NMR spectrum*

Figure S25


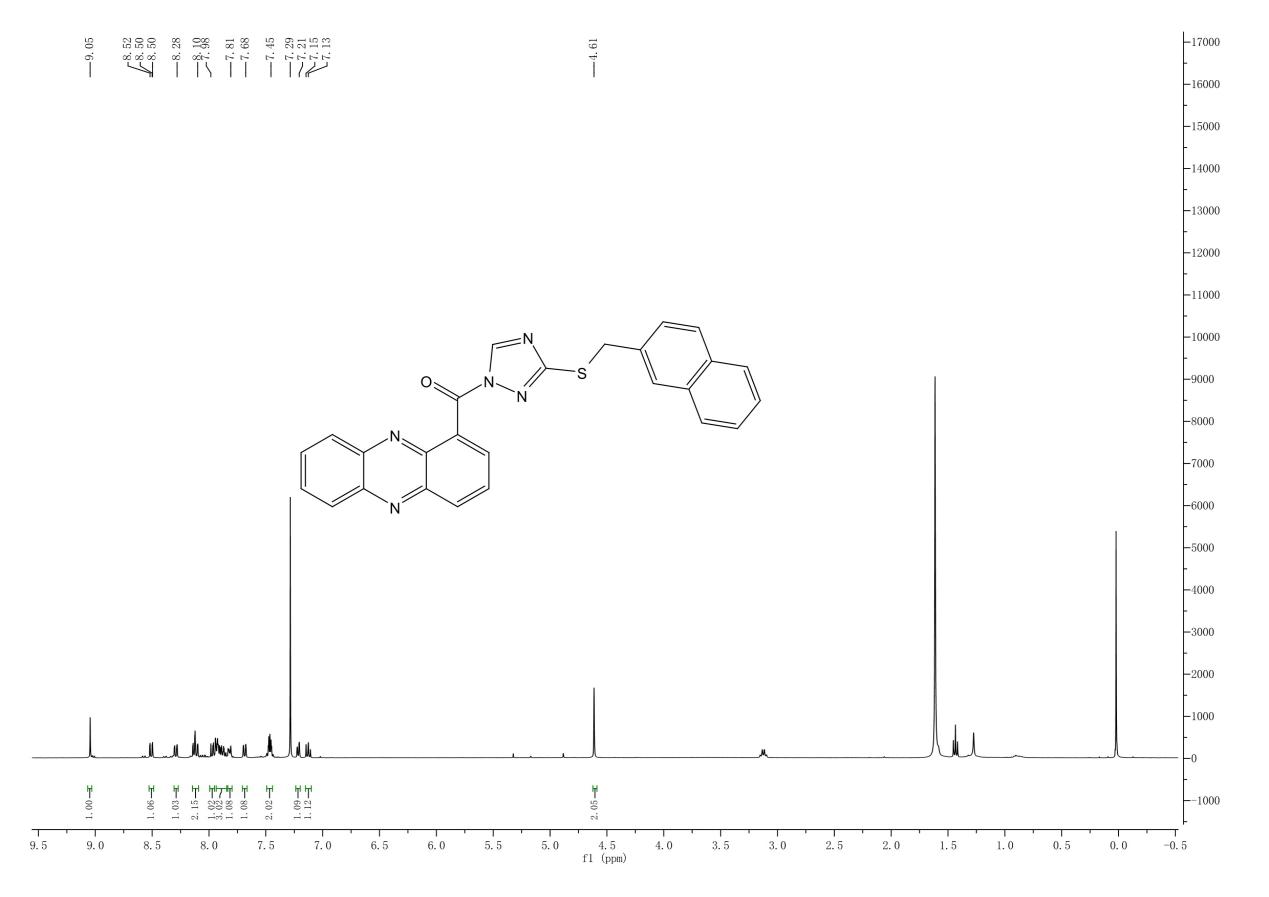


*13C NMR spectrum*

Figure S25


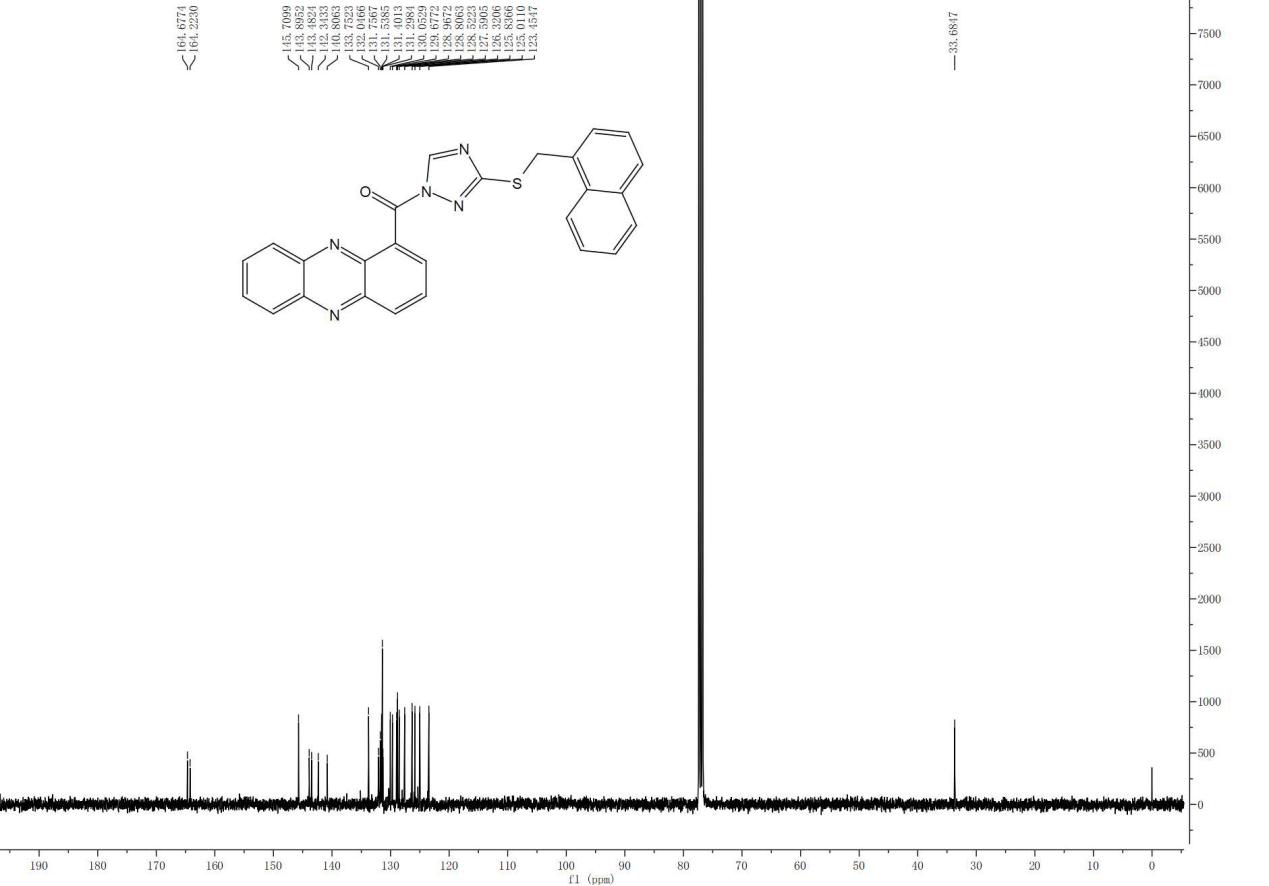


*HRMS Spectrum*

Figure S25


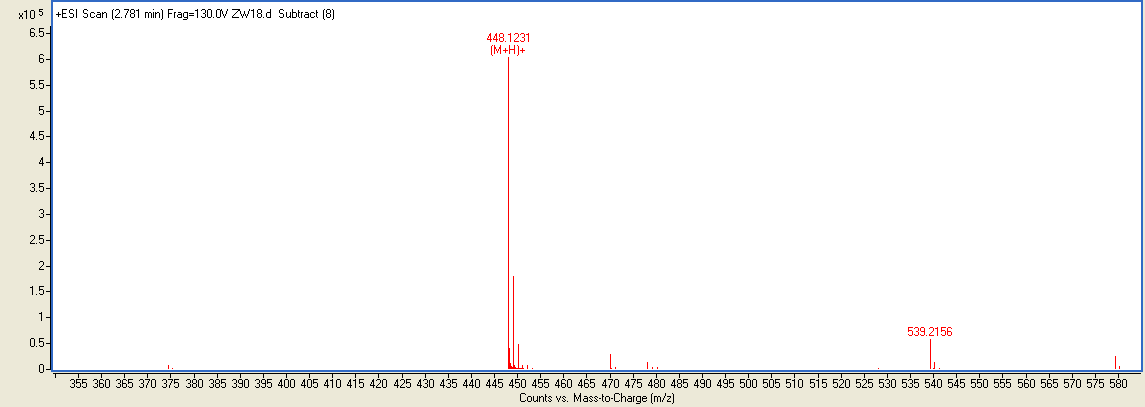

Supplement: Supplementary file 1 [file 22581182]
